# Supplementary material
Source: HighWire-hosted journal article supplement (https://www.rcpjournals.org/highwire/filestream/13925/field_highwire_adjunct_files/0/Subbe_supplementary_material_S1.pdf)
Supplement: Subbe_supplementary_material_S1.pdf [file Subbe_supplementary_material_S1.pdf]

## Supplementary material S1.

**Table S1. Inclusion and exclusion criteria**

| Inclusion criteria                                                                                                                                                                                                                                                                                                    | Exclusion criteria                                                                                                                                                                                                                                                                                                                                                                                                                                                                                                                                                                                                                                                                                                                                                                                                                                                                                                                                                                                                 |
|-----------------------------------------------------------------------------------------------------------------------------------------------------------------------------------------------------------------------------------------------------------------------------------------------------------------------|--------------------------------------------------------------------------------------------------------------------------------------------------------------------------------------------------------------------------------------------------------------------------------------------------------------------------------------------------------------------------------------------------------------------------------------------------------------------------------------------------------------------------------------------------------------------------------------------------------------------------------------------------------------------------------------------------------------------------------------------------------------------------------------------------------------------------------------------------------------------------------------------------------------------------------------------------------------------------------------------------------------------|
| <p>The patient:</p> <ul style="list-style-type: none"><li>• Is being considered for discharge to independent care.</li><li>• Is willing and able to take part in the study and able to give informed consent.</li><li>• has an independent, stable gait.</li><li>• Is alert, attentive, coherent, and calm.</li></ul> | <ul style="list-style-type: none"><li>• Admission for minor injury or injuries.</li><li>• Admission for elective surgery or investigation.</li><li>• Post-operative patients at discharge.</li><li>• Requirement for supplemental oxygen.</li><li>• On long term oxygen therapy.</li><li>• Patient has unstable angina.</li><li>• Patient reporting feeling too short of breath at rest to attempt exertion.</li><li>• Patient is pregnant as stated by them.</li><li>• Resting oxygen saturations &lt;95% on room air (or &lt;92% in COPD patients).</li><li>• Resting heart rate &gt;100 bpm.</li><li>• Resting respiratory rate &gt;25 breath per minute.</li><li>• National Early Warning Score of 5 or more.</li><li>• ECG with signs of acute ischemia in patients where an ECG has been requested by the treating clinician.</li><li>• Nursing home residents, or those being transferred to a nursing home or similar facility, including residential home, hospice, or rehabilitation hospital.</li></ul> |
